# Supplementary material for: Comparative genomics of the Bifidobacterium breve taxon
Source: PubMed Central journal article supplement (PMC4007704; doi:10.1186/1471-2164-15-170), 2014-03-01
Supplement: 12864_2013_7017_MOESM1_ESM.pdf [file 12864_2013_7017_MOESM1_ESM.pdf]

*B. breve*  
UCC2003  
(Bbr-1)

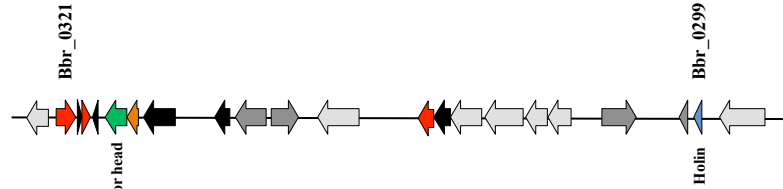

*B. breve*  
689B  
(688b-1)

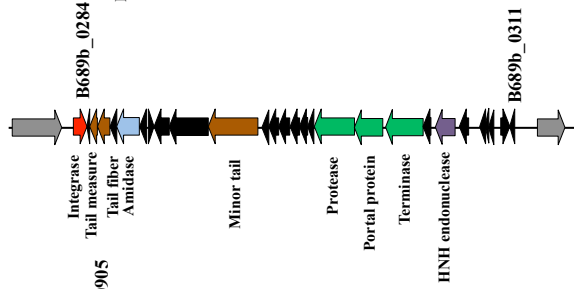

*B. breve*  
JCM 7019  
(7019-1)

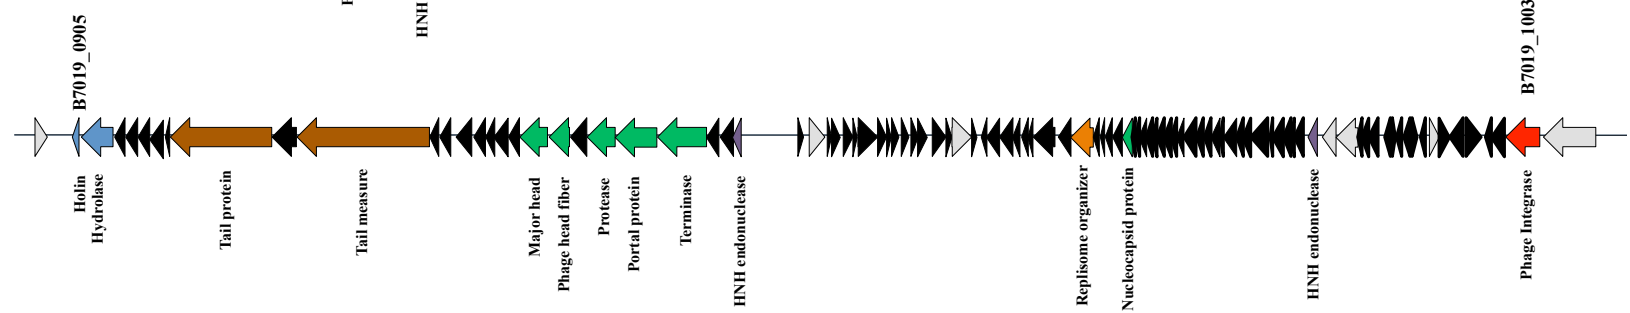

*B. breve*  
S27  
(S27-1)

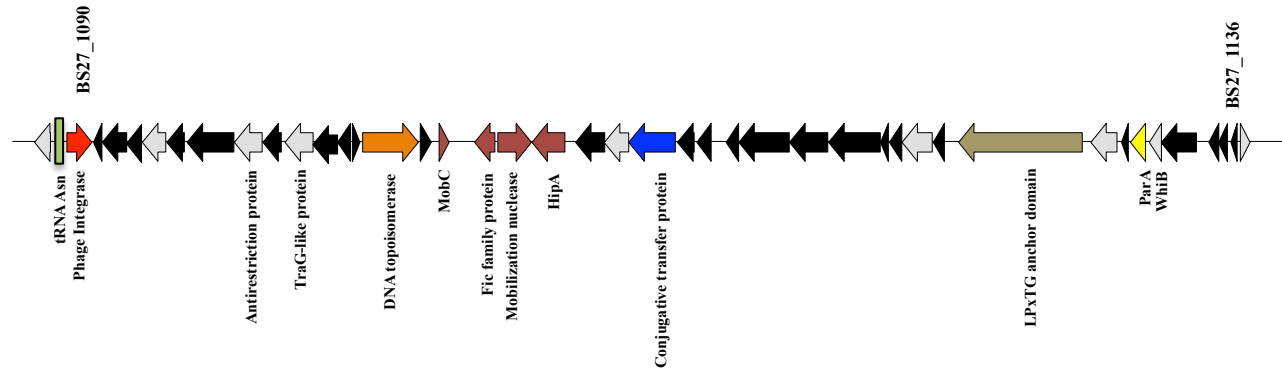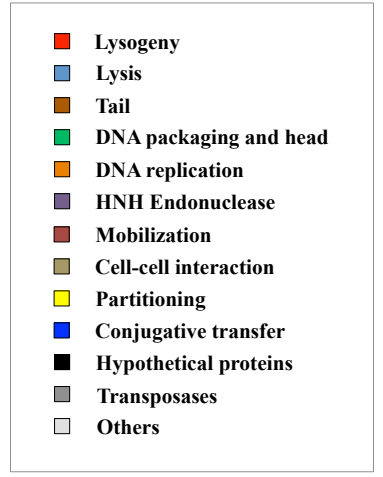

20000

40000

60000
