# Supplementary material for: Comparative genomics of the Bifidobacterium breve taxon
Source: PubMed Central journal article supplement (PMC4007704; doi:10.1186/1471-2164-15-170), 2014-03-01

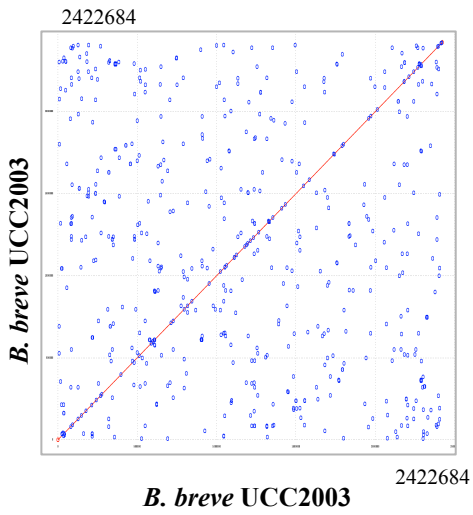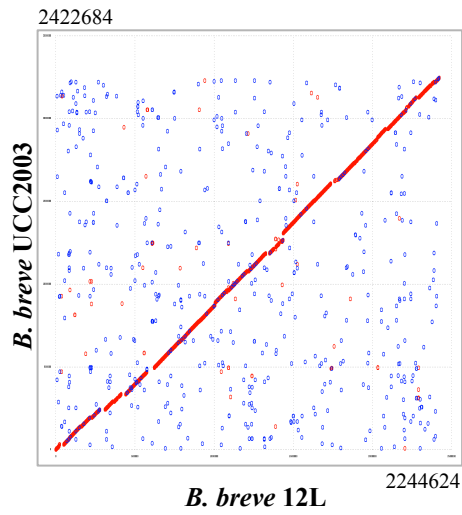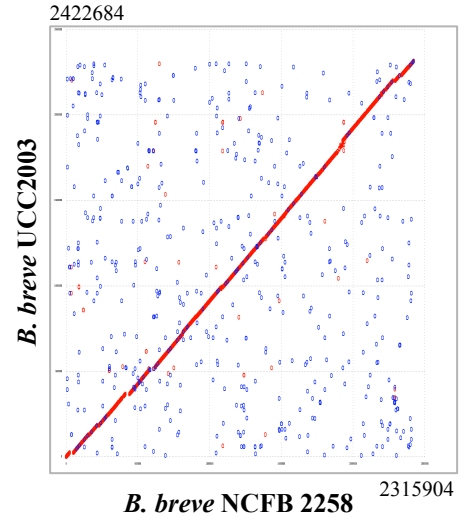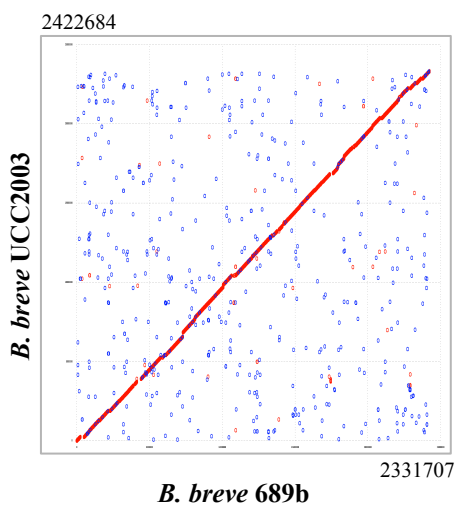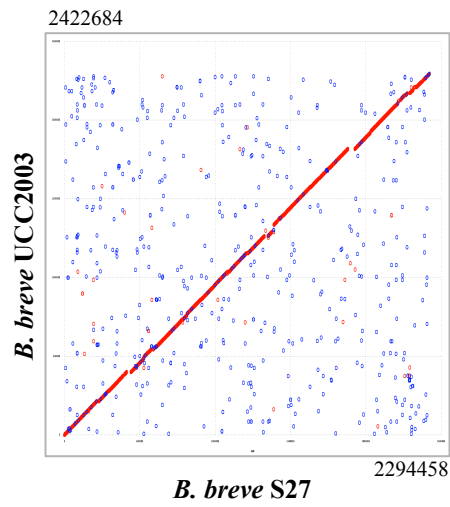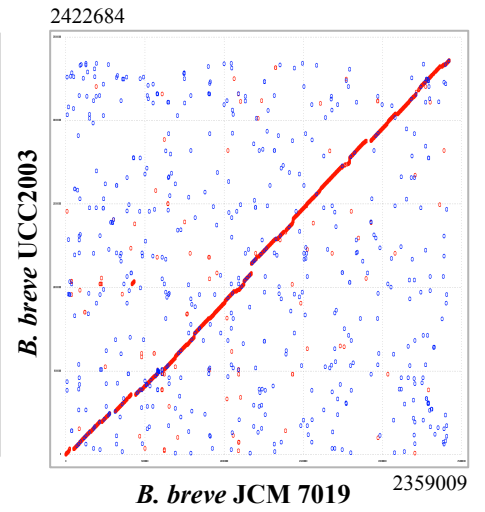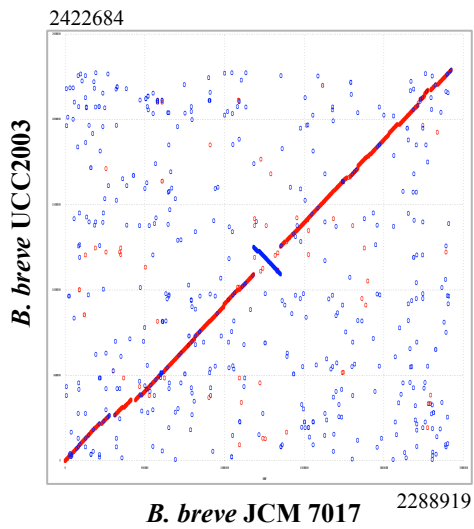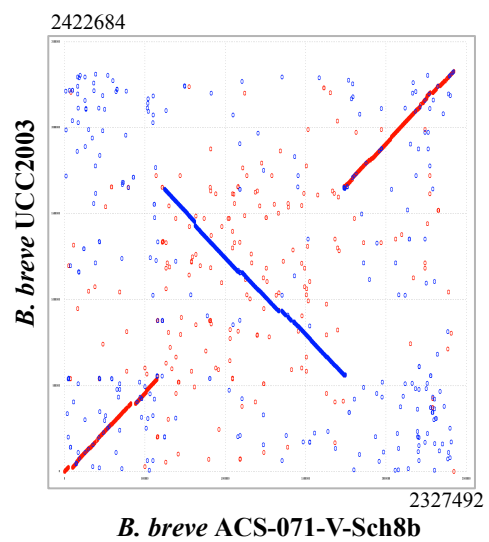

Supplement: 12864_2013_7017_MOESM2_ESM.pdf [file 12864_2013_7017_MOESM2_ESM.pdf]
